# Supplementary material for: Stereoselective synthesis of Z-acrylonitrile derivatives: catalytic and acetylcholinesterase inhibition studies
Source: Royal Society of Chemistry journal article supplement (doi:10.1039/c3nj01384g), 2014-01-01

### Supplementary information

#### **Stereoselective synthesis of Z-acrylonitrile derivatives: Catalytic and acetylcholinesterase inhibition studies**

Mehtab Parveen<sup>a\*</sup>, Ali Mohammed Malla<sup>a</sup>, Mahboob Alam<sup>a</sup>, Musheer Ahmad<sup>b</sup>,  
Shahnawaz R. Rather<sup>b</sup>

<sup>a</sup>*Department of Chemistry, Aligarh Muslim University, Aligarh, 202002, India.*

<sup>b</sup>*Indian Institute of Technology (IIT), Kanpur, 208016. India.*

\* Corresponding author: Tel.: +91 09897179498

E-mail address: [mehtab.organic2009@gmail.com](mailto:mehtab.organic2009@gmail.com)

**Table (S1):** Selected geometrical parameters (Bond Lengths) (Å) of compound **2b**

|                  |                  |                  |
|------------------|------------------|------------------|
| O1 N1 1.237(2)   | O2 N1 1.220(2)   | O3 C10 1.381(2)  |
| O3 C15 1.442(2)  | O4 C11 1.364(3)  | O4 C16 1.434(3)  |
| N1 C1 1.471(3)   | N2 C17 1.147(3)  | C1 C6 1.382(3)   |
| C1 C2 1.391(3)   | C2 C3 1.382(3)   | C3 C4 1.400(3)   |
| C4 C5 1.401(3)   | C4 C7 1.485(3)   | C5 C6 1.383(3)   |
| C7 C8 1.349(3)   | C7 C17 1.449(3)  | C8 C9 1.472(3)   |
| C9 C10 1.399(3)  | C9 C14 1.400(3)  | C10 C11 1.406(3) |
| C11 C12 1.388(3) | C12 C13 1.394(3) | C12 H12 0.9300   |
| C13 C14 1.373(3) |                  |                  |

Selected Bond Angles (°) of compound **2b**

|                        |                        |                       |
|------------------------|------------------------|-----------------------|
| C10 O3 C15 115.03(15)  | C11 O4 C16 116.78(17)  | O2 N1 O1 123.97(18)   |
| O2 N1 C1 117.72(17)    | O1 N1 C1 118.30(17)    | C6 C1 C2 122.11(19)   |
| C6 C1 N1 119.20(18)    | C2 C1 N1 118.69(18)    | C3 C2 C1 118.69(19)   |
| C2 C3 C4 120.67(19)    | C3 C4 C5 119.00(19)    | C3 C4 C7 120.81(18)   |
| C5 C4 C7 120.17(18)    | C6 C5 C4 120.90(19)    | C1 C6 C5 118.62(19)   |
| C8 C7 C17 120.15(19)   | C8 C7 C4 123.75(19)    | C17 C7 C4 115.80(17)  |
| C7 C8 C9 127.39(19)    | C10 C9 C14 118.71(19)  | C10 C9 C8 118.62(18)  |
| C14 C9 C8 122.62(19)   | O3 C10 C9 118.88(17)   | O3 C10 C11 120.13(18) |
| C9 C10 C11 120.79(19)  | O4 C11 C12 124.90(19)  | O4 C11 C10 115.77(18) |
| C12 C11 C10 119.31(19) | C11 C12 C13 119.65(19) |                       |

**Fig. (S1):** Experimentally obtained IR spectrum of compound **2b**

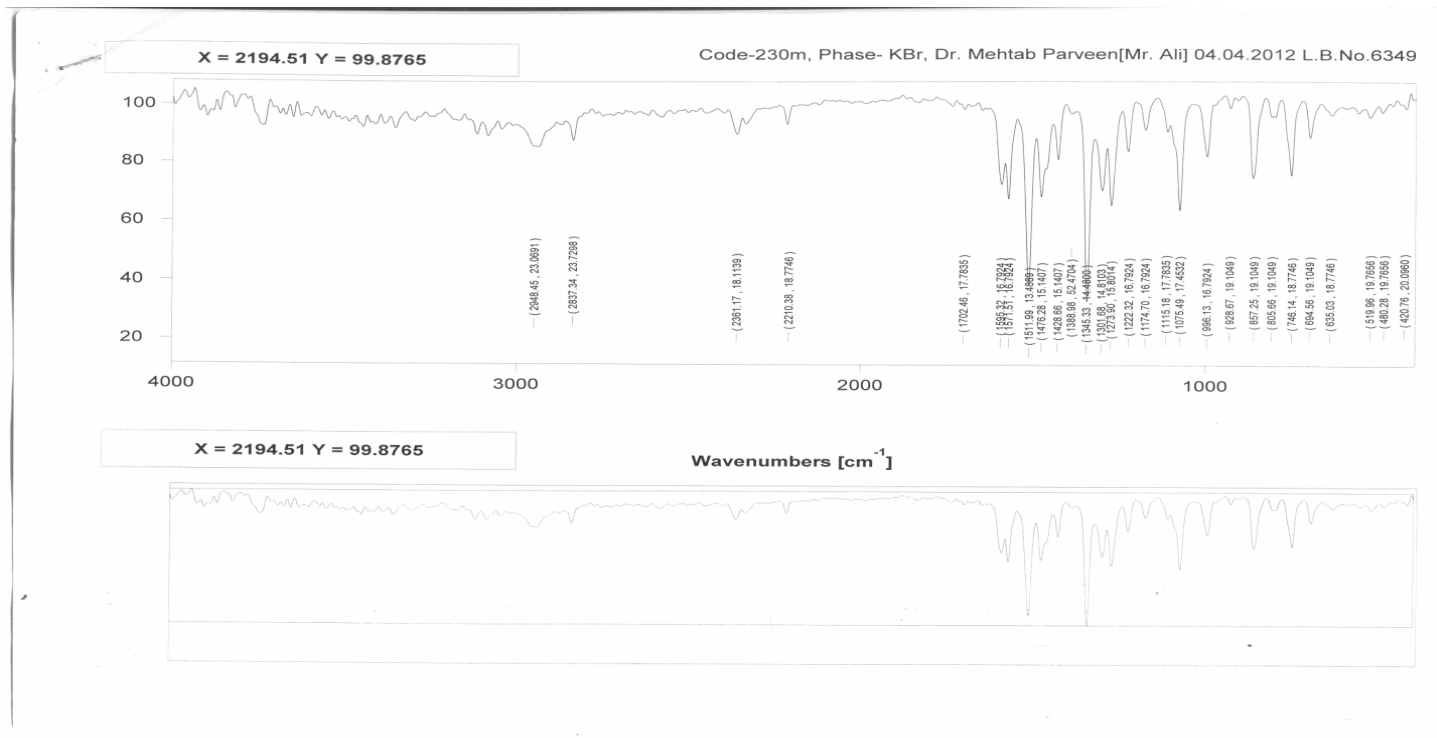

Supplement: c3nj01384g1.pdf [file c3nj01384g1.pdf]
